# Supplementary material for: Molecular cloning and characterization of GhERF105, a gene contributing to the regulation of gland formation in upland cotton (Gossypium hirsutum L.)
Source: PubMed Central journal article supplement (PMC7893949; doi:10.1186/s12870-021-02846-5), 2021-02-18

Fig.S1

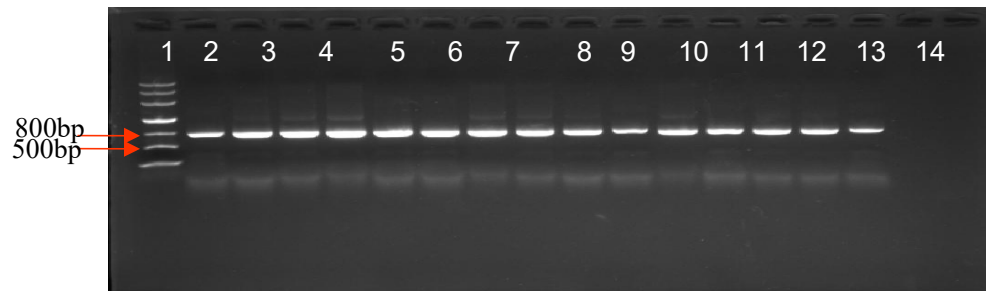

Fig.S2

MACSDETS~~SAQLELIRQHLFTDFASMETPPPFYQL~~SNSESSHVYSPTRLKQSSLSQRRPSINV  
MIPPTSFNISPNPVPDSAAVAVESYEKSHYRGVRRRPWGKFAAEIRDPNKKGARVWLG  
TFDTAIEAAKAYDRAAFKLRGSKAILNFPHEAGKSNFSESGKRRRSVEEGEGEKRVSSL  
ECKAGRREEEVTVAECGTPSNQGTGIGDNEDINEIFGGPLLSP~~LSSFPWFGYSRLEVM\*~~

Fig.S3

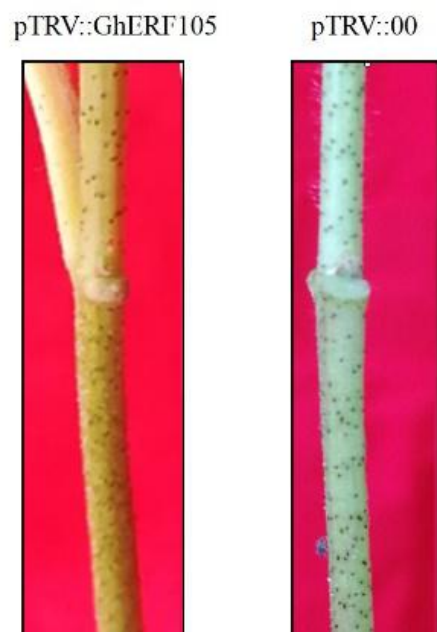

Fig.S4

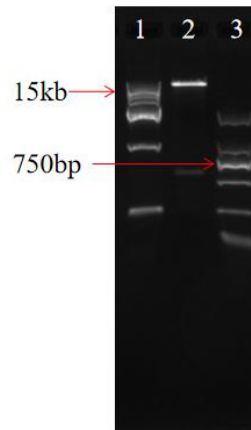

Original version (right)

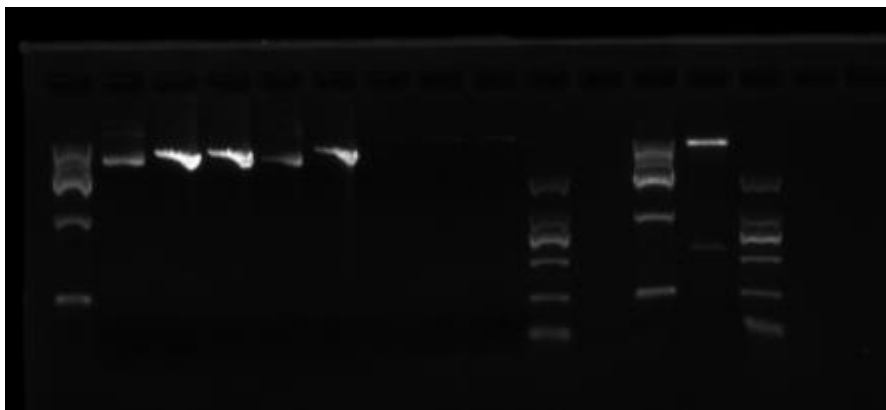

Supplement: 12870_2021_2846_MOESM2_ESM.pdf [file 12870_2021_2846_MOESM2_ESM.pdf]
